# Supplementary material for: Probiotic Lactobacilli Modulate Staphylococcus aureus-Induced Activation of Conventional and Unconventional T cells and NK Cells
Source: PubMed Central journal article supplement (PMC4939411; doi:10.3389/fimmu.2016.00273), 2016-07-11
Supplement: image_1.pdf [file image_1.pdf]

## SUPPLEMENTARY FIGURES

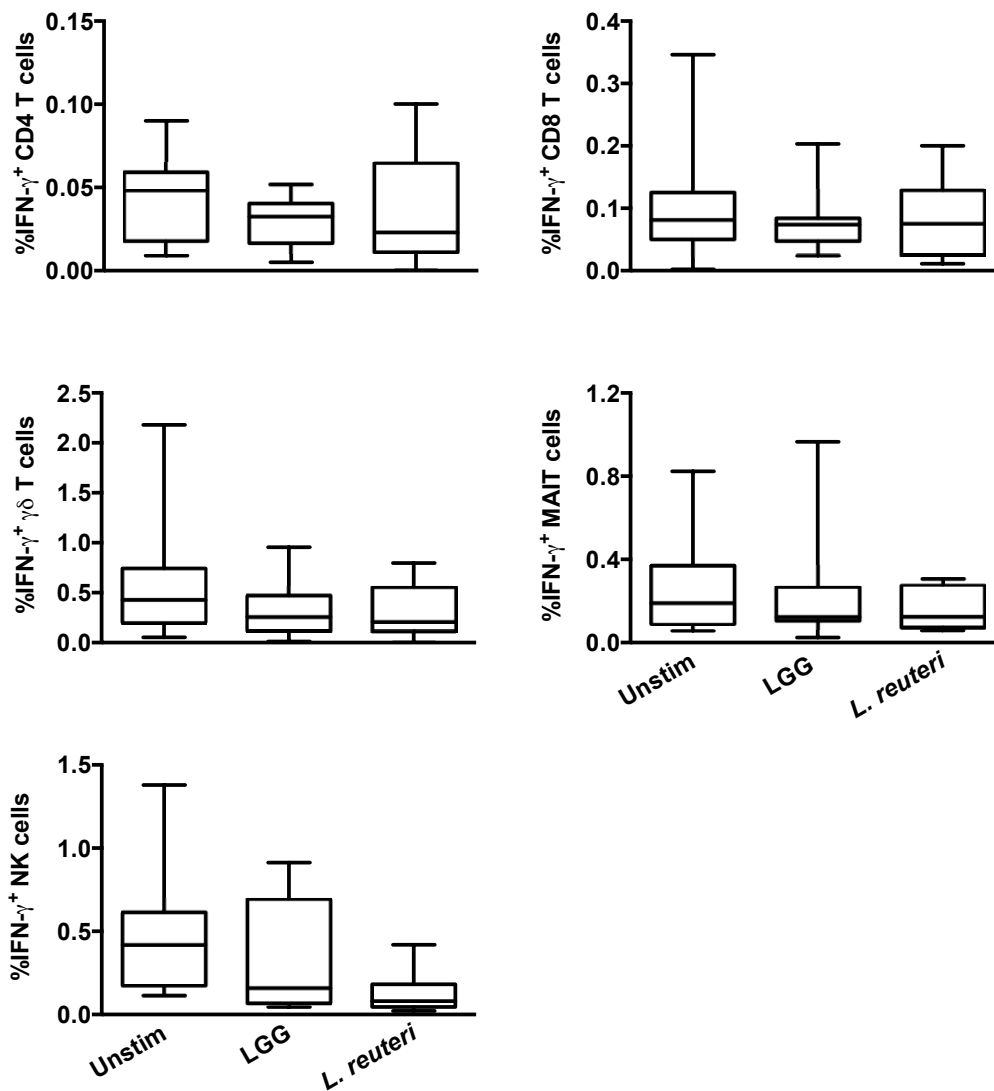

### SUPPLEMENTARY FIGURE 1. Lactobacilli-CFS does not induce intracellular IFN- $\gamma$ expression.

The percentage of IFN- $\gamma$ <sup>+</sup> cells among the CD4<sup>+</sup> (n=10-17), CD8<sup>+</sup> (n=10-18),  $\gamma\delta$  TCR<sup>+</sup> (n=8-15), CD161<sup>+</sup>V $\alpha$ 7.2<sup>+</sup> (n=6-8) and CD3<sup>-</sup>CD56<sup>+</sup> (n=10-17) lymphocyte populations after 24 hour stimulation with LGG-CFS or *L. reuteri*-CFS. Boxes cover data values between the 25<sup>th</sup> and 75<sup>th</sup> percentiles, with the central line as median.
